# Supplementary material for: Melatonin Derivative-Conjugated Formulations of Pd(II) and Pt(II) Thiazoline Complexes on Mesoporous Silica to Enhance Cytotoxicity and Apoptosis against HeLa Cells
Source: MDPI journal article supplement (doi:10.3390/pharmaceutics16010092), 2024-01-10
Supplement: s1 [file s1]

## SUPPLEMENTARY MATERIAL

### Melatonin Derivative-Conjugated Formulations of Pd(II) and Pt(II) Thiazoline Complexes on Mesoporous Silica to Enhance Cytotoxicity and Apoptosis against HeLa Cells

Samuel Estirado<sup>1†</sup>, Diana Díaz-García<sup>2†</sup>, Elena Fernández-Delgado<sup>1</sup>, Emilio Viñuelas-Zahínos<sup>3</sup>, Santiago Gómez-Ruiz<sup>2\*</sup>, Sanjiv Prashar<sup>2</sup>, Ana B. Rodríguez<sup>1</sup>, Francisco Luna-Giles<sup>3</sup>, José A. Pariente<sup>1</sup>, Javier Espino<sup>1\*</sup>

<sup>1</sup> Grupo de Investigación Neuroinmunofisiología y Crononutrición, Departamento de Fisiología, Facultad de Ciencias, Universidad de Extremadura, Avenida de Elvas s/n, 06006 Badajoz, Spain.

<sup>2</sup> COMET-NANO Group, Departamento de Biología y Geología, Física y Química Inorgánica, E.S.C.E.T., Universidad Rey Juan Carlos, Calle Tulipán s/n, 28933 Móstoles, Madrid, Spain.

<sup>3</sup> Grupo de Investigación Química de Coordinación, Departamento de Química Orgánica e Inorgánica, Facultad de Ciencias, Universidad de Extremadura, Avenida de Elvas s/n, 06006 Badajoz, Spain.

<sup>†</sup> These authors equally contributed.

\*Correspondence to: jespino@unex.es; Tel. +34 924289796; santiago.gomez@urjc.es; Tel. +34 914888507

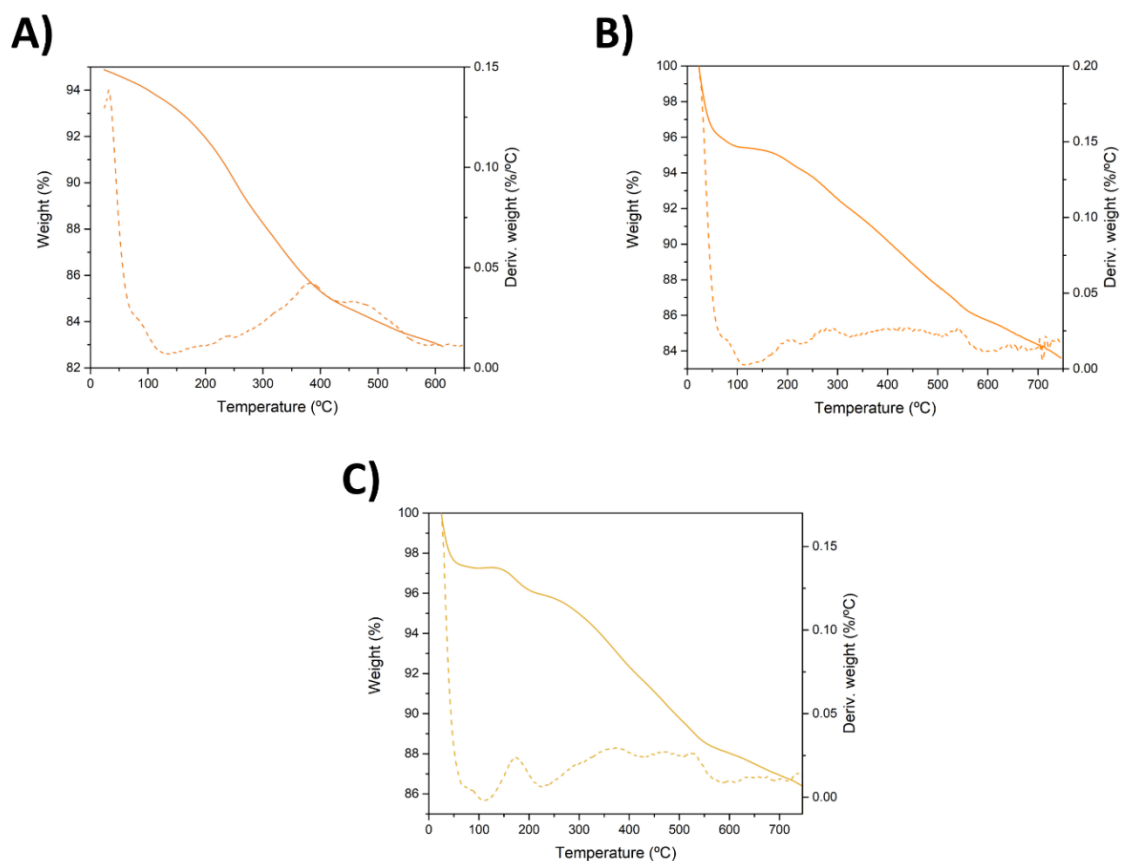

**Figure S1.** TG-DTG curves of MSN-TdTn (A), MSN-5MT (B) and MSN-5MT-TdTn (C).

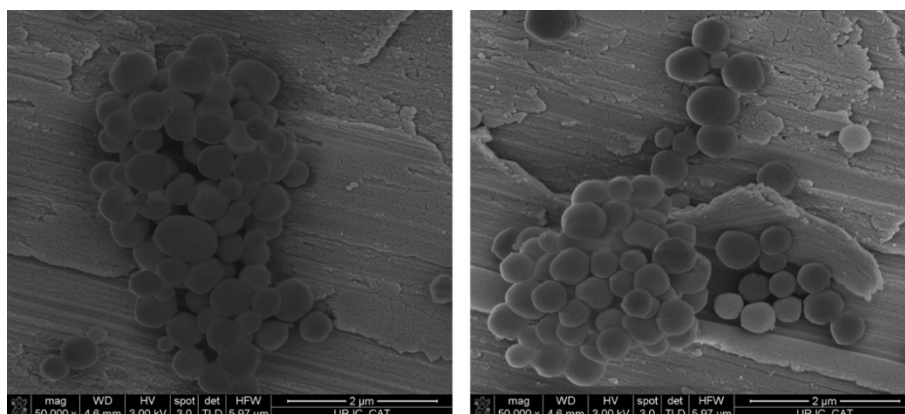

**Figure S2.** SEM micrographs of MSN material.

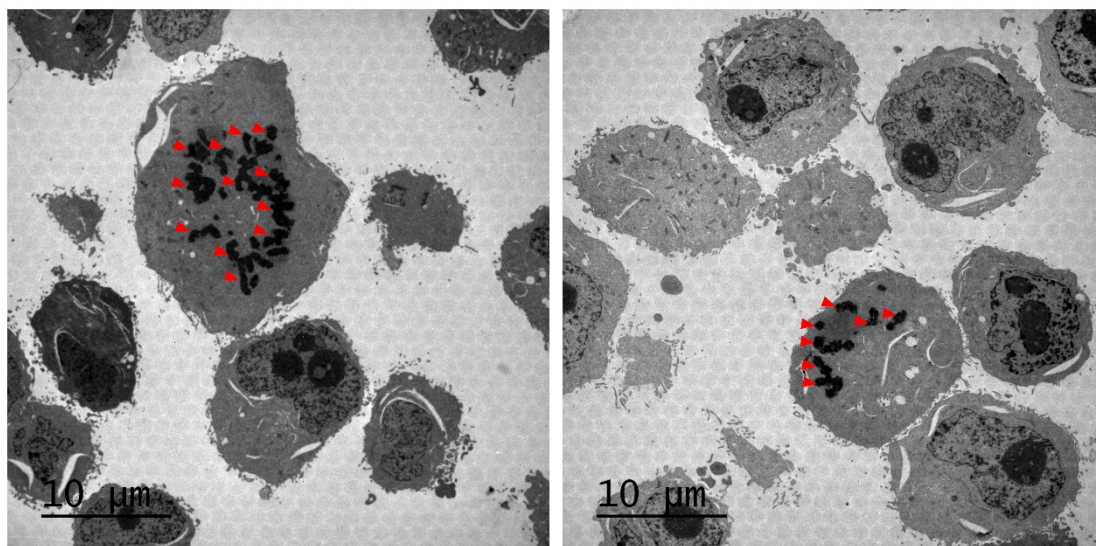

**Figure S3.** Representative TEM images of clusters of palladium-containing MSNs (red arrowheads) internalized in HeLa cells. Scale bar: 10  $\mu\text{m}$ .

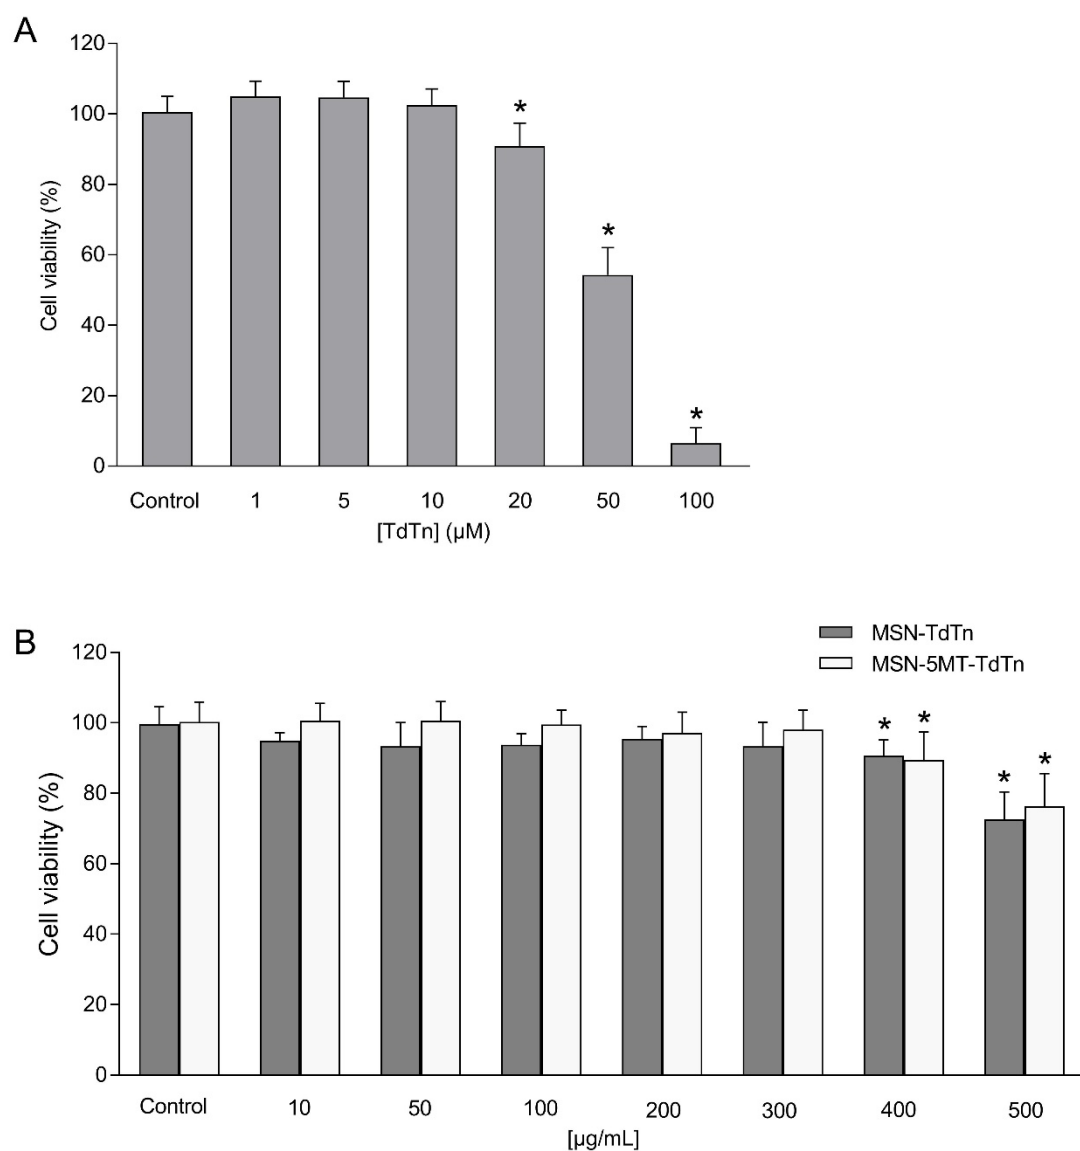

**Figure S4.** Dose-response curve of MSN-TdTn, MSN-5MT-TdTn and the free ligand TdTn on cell viability. **A** HeLa cells were stimulated with increasing concentrations of free TdTn (1-100 μM; **A**), silica-based materials (10-500 μg/mL; **B**) or the vehicle (DMSO) for 24 hours. Values are presented as means ± SD of 5 separate experiments and expressed as percentage of control values. \* $P < 0.05$  compared to control values.

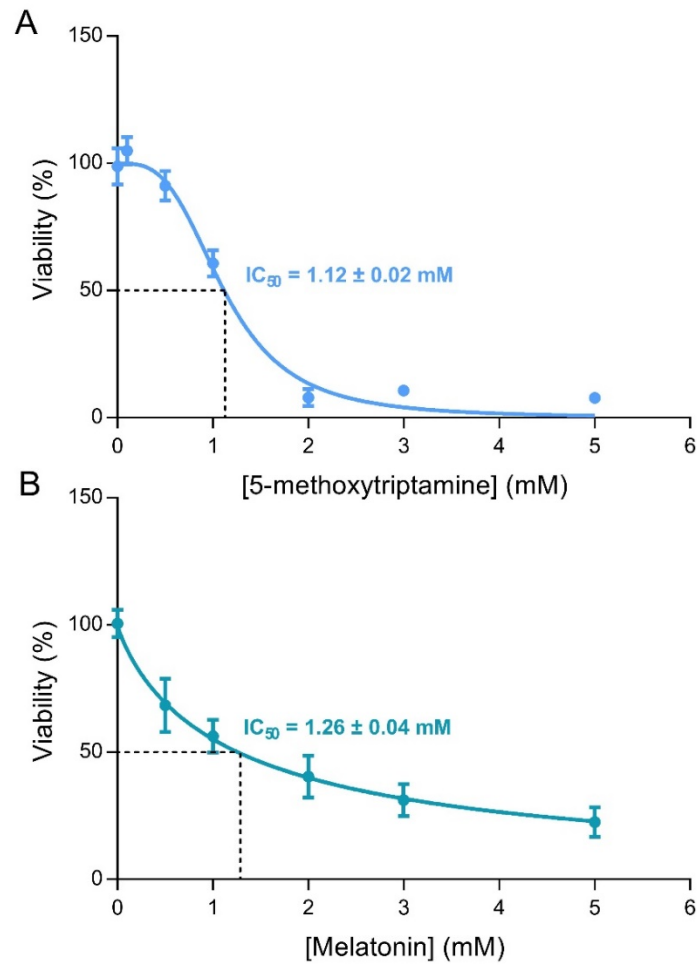

**Figure S5.** Kinetics of the dose-response curve of 5-methoxytryptamine (5MT) and melatonin. HeLa cells were stimulated with increasing concentrations (0.5, 1, 2, 3, and 5 mM) of 5MT (A) and melatonin (B), or the vehicle (DMSO) for 24 h. Values are presented as means  $\pm$  SD of 5 separate experiments and expressed as percentage of control values.  $IC_{50}$  values were calculated by fitting the curve using a four-parameter, sigmoid dose-response equation.
